# Supplementary material for: Interferon characterization associates with asthma and is a potential biomarker of predictive diagnosis
Source: Oxford University Press journal article supplement (doi:10.1042/bsr20204210), 2021-03-01
Supplement: bsr-2020-4210_supp.pdf [file bsr-2020-4210_supp.pdf]

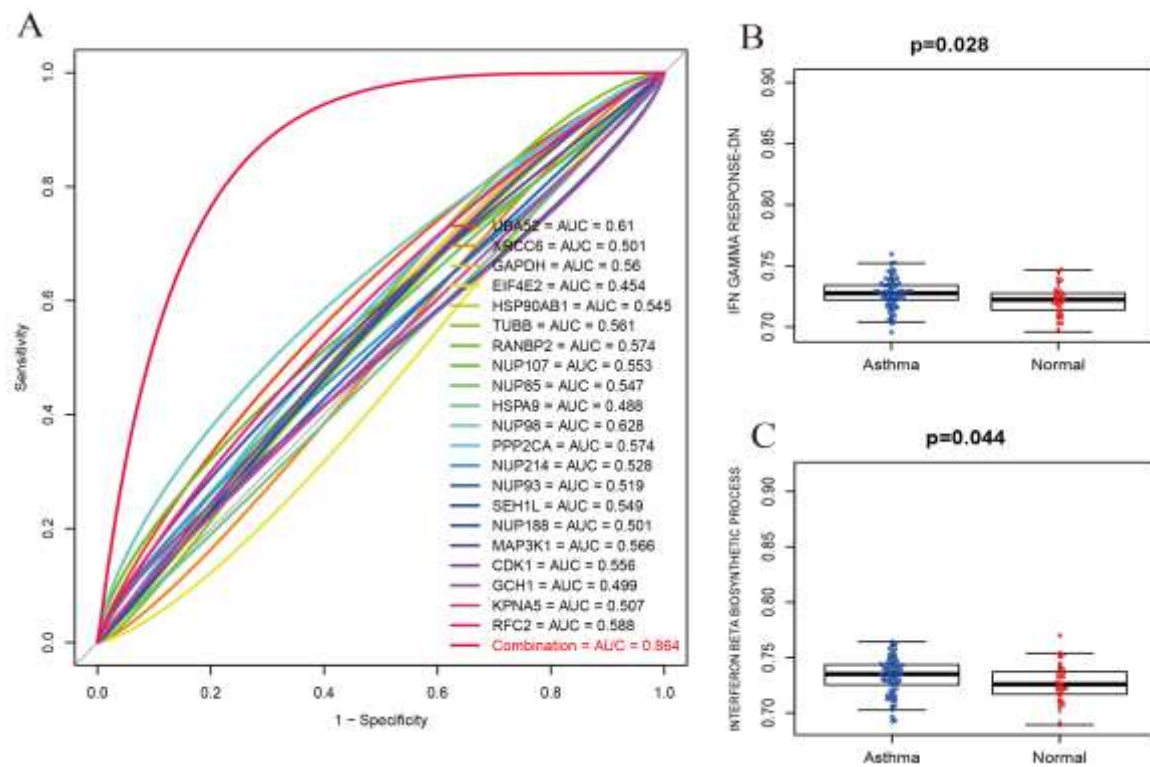

**Figure S1. Role of IFN in bronchoalveolar lavage data.** A) ROC curves of IFN-related genes and their combination to determine their diagnostic capability using bronchoalveolar lavage samples in distinguishing asthma and normal control groups; B) IFN- $\gamma$  response-DN; C) IFN- $\beta$  biosynthetic process.
